# Supplementary material for: Phosphotungstic acid functionalized silica nanocomposites with tunable bicontinuous mesoporous structure and superior proton conductivity and stability for fuel cells
Source: Royal Society of Chemistry journal article supplement (doi:10.1039/c1cp20076c), 2011-01-01
Supplement: c1cp20076c.pdf [file c1cp20076c.pdf]

## Support Information

### Phosphotungstic acid functionalized silica nanocomposites with tunable bicontinuous mesoporous structure and superior proton conductivity and stability for fuel cells

Jie Zeng,<sup>1,2</sup> Yuhua Zhou,<sup>2</sup> Lin Li,<sup>2</sup> San Ping Jiang<sup>1,\*</sup>

#### 1. The proton conductivity measurement

Similar to Nafion membranes, the proton conductivity in this work was calculated as follows:

$$\sigma = \frac{L}{R_{mem} A_{electrode}} \quad (1)$$

Where  $L$  is the thickness of the membrane,  $A_{electrode}$  is the effective area of electrode,  $R_m$  is the membrane resistance measured from the high frequency intercept of the complex impedance curves. Figure S1 shows an example of EIS data of the HPW-meso-silica membrane (Nyquist plot), measured at different temperatures. The resistance of the membrane was measured from the high frequency intercept from the impedance real axis.

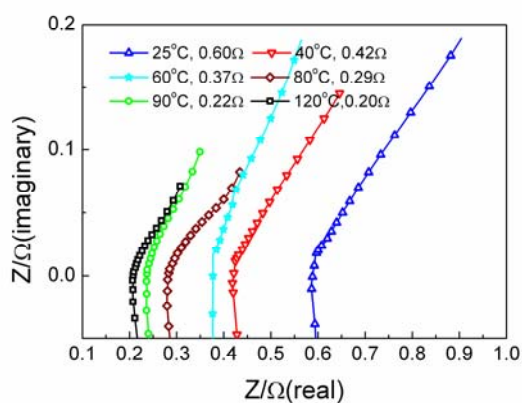

**Figure S1.** Nyquist plot of the HPW-meso-silica membrane

#### 2. FT-IR spectra

FTIR spectra of HPW, mesoporous silica and HPW-meso-silica nanocomposites measured at room temperature. The FTIR spectra show the incorporation of HPW in the meso-silica matrix framework.

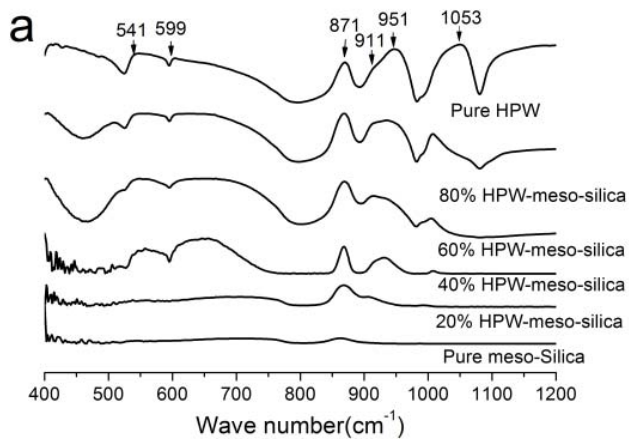

**Figure S3.** FTIR spectra of pure HPW, meso-silica and HPW-meso-silica nanocomposites.
